# Supplementary material for: Impact of Enzymatic and Microbial Bioprocessing on Antioxidant Properties of Hemp (Cannabis sativa L.)
Source: PubMed Central journal article supplement (PMC7763576; doi:10.3390/antiox9121258), 2020-12-10
Supplement: antioxidants-09-01258-s001.pdf [file antioxidants-09-01258-s001.pdf]

**Supplementary Table 1.** Estimated molecular weight range (kDa) and pI of polypeptides found in raw and bioprocessed hemp: H, mixture of hemp flour and water (ratio 1:1); H<sub>x</sub>, mixture of hemp flour and water (ratio 1:1) treated with xylanase Depol 761P (1% wt/wt of fiber); H<sub>p</sub>, mixture of hemp flour and water (ratio 1:1) treated with protease Veron PS (2.5% wt/wt of protein); H<sub>f</sub>, mixture of hemp flour and water (ratio 1:1) fermented by *Lactiplantibacillus plantarum* 18S and *Leuconostoc mesenteroides* 12MM1 (ratio 1:1, final cell density of circa 10<sup>7</sup> cfu/g). All treated samples were incubated at 30° C for 24 h.

| MW (kDa)       | pI range  | H         | H <sub>x</sub> | H <sub>p</sub> | H <sub>f</sub> |
|----------------|-----------|-----------|----------------|----------------|----------------|
| > 37 kDa       | 3 - 5.4   | 0         | 2              | 1              | 1              |
|                | 5.4 - 7.3 | 7         | 1              | 2              | 8              |
|                | 7.3 -10   | 0         | 0              | 3              | 1              |
| 20-37 kDa      | 3 - 5.4   | 2         | 3              | 1              | 4              |
|                | 5.4 - 7.3 | 38        | 25             | 31             | 28             |
|                | 7.3 -10   | 0         | 2              | 10             | 3              |
| 15-20 kDa      | 3 - 5.4   | 0         | 0              | 0              | 2              |
|                | 5.4 - 7.3 | 13        | 15             | 18             | 32             |
|                | 7.3 -10   | 0         | 6              | 5              | 2              |
| < 15 kDa       | 3 - 5.4   | 0         | 4              | 0              | 0              |
|                | 5.4 - 7.3 | 8         | 4              | 28             | 13             |
|                | 7.3 -10   | 0         | 5              | 7              | 4              |
| <b>Tot. N°</b> |           | <b>68</b> | <b>67</b>      | <b>106</b>     | <b>98</b>      |

Analyses were carried out with Image Master software (Amersham Pharmacia Biotech, Uppsala, Sweden).

Spot designation corresponds to those of the gels in Figure 1A-D. Data are the means of three independent experiments ± standard deviations (n = 3).
